# Supplementary material
Source: Springer Nature journal article supplement (https://www.springermedizin.de/resource/supplementary/13256_2007_134_MOESM1_ESM.pdf/9645358)

# FT4 and FT3 fluctuations

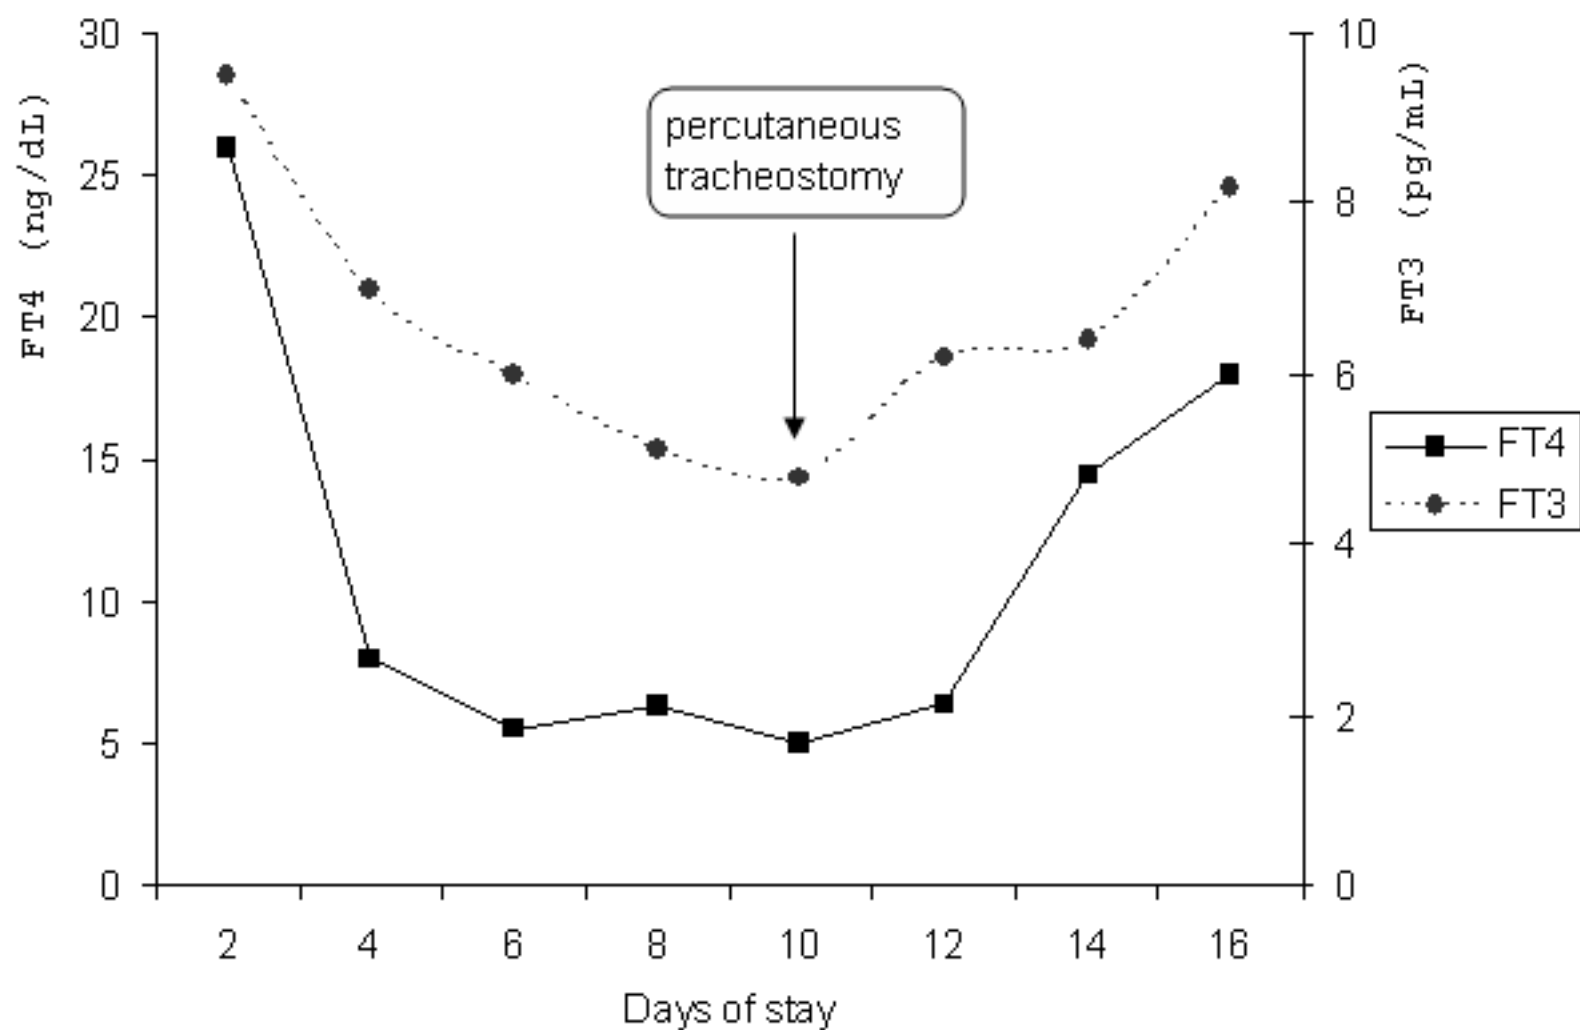

Supplement: MOESM1 [file 9645358]
